# Supplementary material
Source: Springer Nature journal article supplement (https://www.springermedizin.de/resource/supplementary/13002_2013_415_MOESM4_ESM.pdf/9626864)

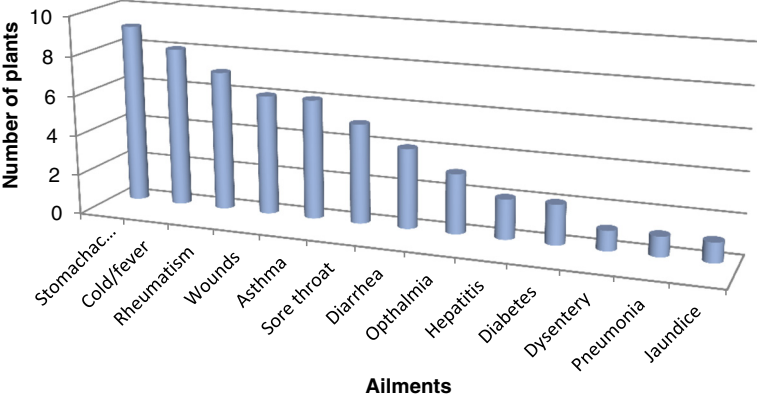

Supplement: MOESM4 [file 9626864]
